# Supplementary material
Source: Royal Society of Chemistry journal article supplement (doi:10.1039/d5em00972c)
Supplement: d5em00972c1.pdf [file d5em00972c1.pdf]

## Supporting Information

### **Nano-silver triggers apoptosis through the mitochondria-dependent pathway in the gills of common carp**

Qianqian Xiang<sup>1,2\*</sup>, Yanping Wu<sup>1</sup>, Peng Wang<sup>2</sup>, Hui Yan<sup>2,3</sup>, and Liqiang Chen<sup>2\*</sup>

<sup>1</sup>Yunnan Collaborative Innovation Center for Plateau Lake Ecology and Environmental Health, College of Agronomy and Life Sciences, Kunming University, Kunming 650214, China

<sup>2</sup>Institute of International Rivers and Eco-security, Yunnan Key Laboratory of International Rivers and Trans-Boundary Eco-security, Yunnan University, Kunming, 650091, People's Republic of China.

<sup>3</sup>Yunnan Institute of Water & Hydropower Engineering Investigation, Design Co., Ltd. Kunming 650021, China.

Corresponding author: \* Liqiang Chen, Email: chenlq@ynu.edu.cn; Qianqian Xiang, Email: xiangqqian@163.com.

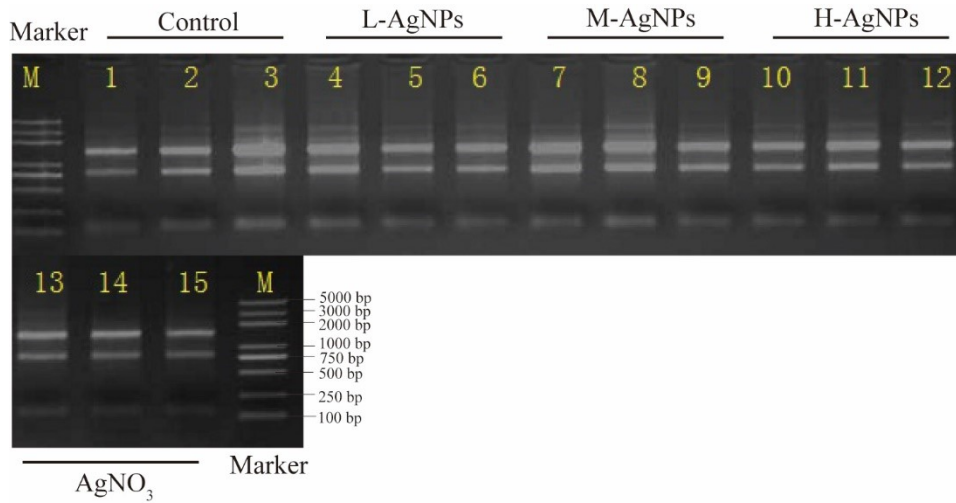

**Figure S1. Agarose gel electrophoresis image of gill RNA of common carp after exposure to different treatment. L-AgNPs: Low concentration of nano-silver. M-AgNPs: Moderate concentration of nano-silver. H-AgNPs: High concentration of nano-silver.**

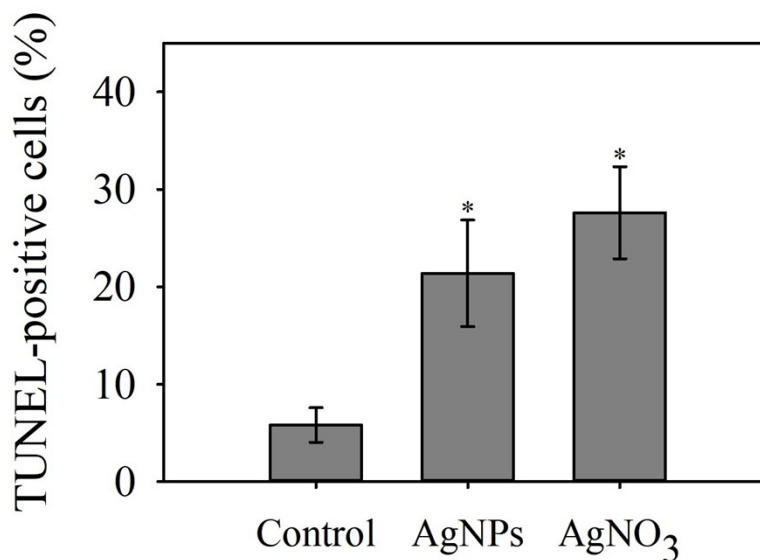

**Figure S2. The percentage of TUNEL-positive cells at different treatment.**

**Table S1.** The concentration of total RNA in the gills after exposed to nano-silver and silver nitrate #.

| Treatment         | The concentration of total RNA (ng/ $\mu$ L) | The content of total RNA ( $\mu$ g) |
|-------------------|----------------------------------------------|-------------------------------------|
| Control           | 1071.63 $\pm$ 263.517                        | 32.15 $\pm$ 7.91                    |
| L-AgNPs           | 864.03 $\pm$ 57.61                           | 25.92 $\pm$ 1.73                    |
| M-AgNPs           | 1158.97 $\pm$ 454.99                         | 34.77 $\pm$ 13.65                   |
| H-AgNPs           | 1265.47 $\pm$ 209.78                         | 37.96 $\pm$ 6.92                    |
| AgNO <sub>3</sub> | 974.33 $\pm$ 532.31                          | 29.23 $\pm$ 15.97                   |

#L-AgNPs: Low concentration of nano-silver. M-AgNPs: Moderate concentration of nano-silver. H-AgNPs: High concentration of nano-silver.

**Table S2.** Primer used for gene expression analysis through qRT-PCR.

| Type               | Gene             | Primer sequence (5'-3')                                      | Genbank number                    |
|--------------------|------------------|--------------------------------------------------------------|-----------------------------------|
|                    | <i>jnk</i>       | F: ACACGTTACTACAGAGCCCC<br>R: AACTCCTGGGATGGTGTTC            | AB001744.1 (Jia et al., 2020)     |
|                    | <i>erk</i>       | F: GCTCAACTCCAAGGGCTACA<br>R: GGTTTCTGGGGTAGAGCCTG           | AB006038.1 (Jia et al., 2020)     |
|                    | <i>p38</i>       | F: TCAGAACTTGCTCCCGTCG<br>R: GCTTGAGTAGTCGCAATTCCC           | D83274.1 (Jia et al., 2020)       |
|                    | <i>ap-1</i>      | F: GTCCAAATGCCGGAAGAGGA<br>R: TCGTCAACATAAGCTGGCA            | XM_019126150.1 (Jia et al., 2020) |
| Apoptosis          | <i>fas</i>       | F: GACCTGAACCCTCACCTATCAG<br>R: TGGGTAGGCTCCATGTAAACC        | KJ174688.1 (Jia et al., 2020)     |
|                    | <i>fadd</i>      | F: AGCCCTCTGATGTACCAGA<br>R: GTGCTTCTCTGTATGCCGT             | XM_019064931.1 (Jia et al., 2020) |
|                    | <i>caspase-8</i> | F: TTCAAGCCTGCCAAGGAAGT<br>R: CTCTAGTGTGGCGGAAGGAC           | KC822471.1 (Jia et al., 2020)     |
|                    | <i>cytc</i>      | F: GGTTTTTCGTCCAGAAGTGCG<br>R: CCGGTCTGCGTCCAAAAAG           | KJ174687.1 (Jia et al., 2020)     |
|                    | <i>caspase-9</i> | F: AGGGAGTCAGGCTTTTCCAG<br>R: AGTGAAGGCTGTATGGGGAC           | KC676314.1 (Jia et al., 2020)     |
|                    | <i>caspase-3</i> | F: ACAGGCATGAACCAACGGAA<br>R: TGTGGTCGTTATGGGCAACT           | KF055462.1 (Jia et al., 2020)     |
|                    | <i>bcl-2</i>     | F: ATGTGCGTGGAAGCGTCAAC<br>R: AAAGGCTCCGATGGTCACTCC          | KJ174686 (Chen et al., 2020)      |
|                    | <i>bax</i>       | F: TCCACTCTTCAACCAACTC<br>R: GCCAATAGTCTGCCATGT              | KJ174685.1 (Wang et al., 2019)    |
|                    | <i>p53</i>       | F: GGG CAA TCA GCG AGC AAA<br>R: ACT GAC CTT CCT GAG TCT CCA | AF365873 (Jiao et al., 2019)      |
| Internal reference | <i>β-actin</i>   | F: ATCCGTAAAGACCTGTATGCCA<br>R: GGGGAGCAATGATCTTGATCTTCA     | JQ619774.1 (Tang et al., 2012)    |

**References**

- Chen, J.J., Liu, N., Zhang, H.J., Zhao, Y.D., Cao, X.L., 2020. The effects of *Aeromonas hydrophila* infection on oxidative stress, nonspecific immunity, autophagy, and apoptosis in the common carp. *Dev. Comp. Immunol.* 105, 103587. <https://doi:10.1016/j.dci.2019.103587>.
- Jia, R., Du, J.L., Cao, L.P., Feng, W.R., He, Q., Xu, P., Yin, G.J., 2020. Chronic exposure of hydrogen peroxide alters redox state, apoptosis and endoplasmic reticulum stress in common carp (*Cyprinus carpio*). *Aquat. Toxicol.* 229, 105657. <https://doi:10.1016/j.aquatox.2020.105657>.
- Jiao, W.Y., Han, Q., Xu, Y.M., Jiang, H.J., Xing, H.J., Teng, X.H., 2019. Impaired immune function and structural integrity in the gills of common carp (*Cyprinus carpio* L.) caused by chlorpyrifos exposure: through oxidative stress and apoptosis. *Fish Shellfish Immunol.* 86, 239-245. <https://doi:10.1016/j.fsi.2018.08.060>.
- Tang, Y.K., Yu, J.H., Xu, P., Li, J.L., Li, H.X., Ren, H.T., 2012. Identification of housekeeping genes suitable for gene expression analysis in Jian carp (*Cyprinus carpio* var. jian). *Fish Shellfish Immunol.* 33, 775-779. <https://doi:10.1016/j.fsi.2012.06.027>.
- Wang, S., Zhang, Q., Zheng, S., Chen, M., Zhao, F., Xu, S., 2019. Atrazine exposure triggers common carp neutrophil apoptosis via the CYP450s/ROS pathway. *Fish Shellfish Immunol.* 84, 551-557. <https://doi:10.1016/j.fsi.2018.10.029>.
